# Lkb1 Deficiency Alters Goblet and Paneth Cell Differentiation in the Small Intestine

Boris Y. Shorning<sup>1,9</sup>, Joanna Zabkiewicz<sup>2,9</sup>, Afshan McCarthy<sup>3</sup>, Helen B. Pearson<sup>4</sup>, Douglas J. Winton<sup>6</sup>, Owen J. Sansom<sup>5</sup>, Alan Ashworth<sup>3</sup>, Alan R. Clarke<sup>1\*</sup>

**1** Cardiff School of Biosciences, Cardiff University, Cardiff, United Kingdom, **2** Department of Haematology, School of Medicine, Cardiff University, Cardiff, United Kingdom, **3** The Breakthrough Breast Cancer Research Centre, The Institute of Cancer Research, London, United Kingdom, **4** Peter MacCallum Cancer Institute, Research division, Cell Cycle and Cancer Genetics Laboratory, East Melbourne, Victoria, Australia, **5** The Beatson Institute for Cancer Research, Garscube Estate, Glasgow, United Kingdom, **6** Department of Oncology, Cancer Research UK, Cambridge, United Kingdom

## Abstract

The Lkb1 tumour suppressor is a multitasking kinase participating in a range of physiological processes. We have determined the impact of Lkb1 deficiency on intestinal homeostasis, particularly focussing on secretory cell differentiation and development since we observe strong expression of Lkb1 in normal small intestine Paneth and goblet cells. We crossed mice bearing an *Lkb1* allele flanked with LoxP sites with those carrying a Cyp1a1-specific inducible Cre recombinase. Lkb1 was efficiently deleted from the epithelial cells of the mouse intestine after intraperitoneal injection of the inducing agent  $\beta$ -naphthoflavone. Bi-allelic loss of Lkb1 led to the perturbed development of Paneth and goblet cell lineages. These changes were characterised by the lack of Delta ligand expression in Lkb1-deficient secretory cells and a significant increase in the levels of the downstream Notch signalling effector Hes5 but not Hes1. Our data show that Lkb1 is required for the normal differentiation of secretory cell lineages within the intestine, and that Lkb1 deficiency modulates Notch signalling modulation in post-mitotic cells.

**Citation:** Shorning BY, Zabkiewicz J, McCarthy A, Pearson HB, Winton DJ, et al. (2009) Lkb1 Deficiency Alters Goblet and Paneth Cell Differentiation in the Small Intestine. PLoS ONE 4(1): e4264. doi:10.1371/journal.pone.0004264

**Editor:** Rory Edward Morty, University of Giessen Lung Center, Germany

**Received:** August 26, 2008; **Accepted:** December 8, 2008; **Published:** January 23, 2009

**Copyright:** © 2009 Shorning et al. This is an open-access article distributed under the terms of the Creative Commons Attribution License, which permits unrestricted use, distribution, and reproduction in any medium, provided the original author and source are credited.

**Funding:** Cancer Research UK, The Wales Gene Park and Breakthrough Breast Cancer. The funders had no role in study design, data collection and analysis, decision to publish, or preparation of the manuscript.

**Competing Interests:** The authors have declared that no competing interests exist.

\* E-mail: clarkear@Cardiff.ac.uk

<sup>9</sup> These authors contributed equally to this work.

## Introduction

Lkb1 is a tumour suppressor implicated in a wide range of cellular functions including inhibition of cell proliferation [1,2]. Human *LKB1* gene mutations are known to underlie Peutz-Jeghers syndrome (PJS) characterised by intestinal hamartoma development [3,4,5]. It was recently shown that mesenchyme-specific Lkb1 deletion results in gastrointestinal polyps indistinguishable from those in PJS, suggesting a non-epithelial origin for intestinal hamartomas [6]. Functionally, Lkb1 phosphorylates a conserved threonine in the activation loops of AMPK and a range of AMPK-related kinases, including MARK kinases [7,8]. The Lkb1/AMPK system has been proposed to act as an energy sensor to low ATP levels inhibiting mTOR-mediated cell growth [9]. Lkb1-mediated phosphorylation of AMPK has also been shown to be essential for the coordination between epithelial polarity and cellular energy status, suggesting one potential mechanism underlying Lkb1 tumor suppressor function [10].

To define the role played by Lkb1 in normal intestinal epithelium, we crossed mice bearing a LoxP flanked *Lkb1* cDNA cassette [11] with mice carrying a Cyp1a1-specific inducible Cre recombinase construct (*AhCre*). In the absence of induction, the *AhCre* transgene mediates recombination within a proportion of prostatic epithelial cells, ultimately leading to the development of prostatic intraepithelial neoplasia (PIN) by 200 days [12]. In

contrast, induction of the *AhCre* transgene using  $\beta$ -naphthoflavone results in rapid, high penetrance conditional gene deletion in the epithelium of the murine gastrointestinal tract [13]. This approach allowed us to generate Lkb1-deficient intestinal epithelium *in vivo* and assess the consequences of *Lkb1* gene function loss independently of any delayed phenotype arising in the prostate. These studies reveal, for the first time, the functional requirement for Lkb1 in the mouse intestinal epithelium.

## Results

### Lkb1 loss in the small intestinal epithelium

We generated *AhCre<sup>+</sup>Lkb1<sup>fl/fl</sup>* mice which were transgenic for both the *AhCre* transgene [13] and were homozygous for a *LoxP* flanked *Lkb1* cDNA cassette [11]. As a control we used *AhCre<sup>-</sup>Lkb1<sup>fl/fl</sup>* mice lacking the *AhCre* transgene. Both *AhCre*-positive and *AhCre*-negative mice received a series of  $\beta$ -naphthoflavone intraperitoneal injections. These injections induced Cre recombinase expression in the intestinal crypt of *Cre*-positive animals [13,14]. Cre-recombinase induction in the intestinal epithelium of *AhCre<sup>+</sup>Lkb1<sup>fl/fl</sup>* mice resulted in the removal of the entire kinase domain of Lkb1 (exons 4–10 of Lkb1). The regime of four daily injections produced high levels of recombination within the intestine as evidenced by qRT-PCR analysis of *Lkb1* mRNA levels, which demonstrated a 16.5 fold reduction ( $P < 0.05$ , Mann-

Whitney U test) by day 4 compared to  $\beta$ -naphthoflavone injected control mice (*AhCre<sup>-</sup>Lkb1<sup>fl/fl</sup>*).

Previous studies have shown that Lkb1 mRNA is normally localised to all epithelial intestinal cells [15]. We show here that high levels of Lkb1 protein are primarily observed in the cytoplasm of goblet and Paneth cells in the small intestine (fig 1 A, “+/+”). The induction of Cre expression in *AhCre<sup>+</sup>Lkb1<sup>fl/fl</sup>* mice led to the disappearance of Lkb1 staining from Paneth and goblet cells by day 6 (fig 1 A, “-/-”) as assessed by immunohistochemistry. The level of recombination was more than 95% with very few crypts retaining Lkb1 staining (fig 1 A, “-/-” red circle). Western blot analysis also confirmed a drastic decrease in Lkb1 levels in the recombined tissue by day 6 (fig 1 B).

The induction of Cre recombinase by  $\beta$ -naphthoflavone was also monitored using the surrogate *Rosa26R* reporter locus [16]. By day 6,  $\beta$ -galactosidase activity was detected throughout the whole small intestinal tissue of *AhCre<sup>+</sup>Lkb1<sup>fl/fl</sup>* mice (fig 1, C, Cre<sup>+</sup>). At the same timepoint there was no detectable  $\beta$ -galactosidase activity in the intestines of Cre-negative *Lkb1<sup>fl/fl</sup>* mice induced with  $\beta$ -naphthoflavone (fig 1, C, Cre<sup>-</sup>). We observed a high level of recombination according to both X-Gal staining (fig 1, D) and anti- $\beta$ -galactosidase immunostaining (fig 1, E) in both WT and Lkb1-deficient tissue. Paneth cells are known to have low turnover rates and would therefore be expected to be  $\beta$ -galactosidase negative. However, Paneth cells stained positively in Lkb1-deficient crypts suggesting an increase in the turnover of these cells in Lkb1-deficient intestines (fig 1, E).

It has been reported previously that the unrecombined mutant *Lkb1* allele is hypomorphic, with an almost 10-fold reduction in expression in some tissues [11]. Consistent with this, we observed a reduced level of Lkb1 mRNA in the intestine ( $P < 0.05$ , Mann-Whitney U test), however the extent of this reduction was only 1.85 fold and was not associated with any detectable phenotypic change.

Mice harbouring the *AhCre* transgene have been reported to show spontaneous levels of recombination (in the absence of  $\beta$ -naphthoflavone induction) in both the kidney and genitourinary tract [14,12], but not in the intestine [17]. Previously our group employed this spontaneous activation of *AhCre* in the genitourinary tract of male *AhCre<sup>+</sup>Lkb1<sup>fl/fl</sup>* mice as a powerful model for prostate cancer [12]. These male mice develop PIN at approximately 200 days [12], and therefore these phenotype would not have impacted upon our intestinal studies. However, to ensure this was the case we preferentially used female mice for our experiments. We also confirmed that the spontaneous background recombination in the intestine was very low according to both  $\beta$ -galactosidase staining and also quantitative RT-PCR, which did not identify any differences between *Lkb1* mRNA levels in the intestines of non-induced Cre-negative and Cre-positive *Lkb1<sup>fl/fl</sup>* mice (data not shown).

### Lkb1 loss changes secretory cell morphology

Lkb1 loss led to the enlargement of mucin-secreting cells, as evidenced by Alcian blue staining (fig 1, A) and also by haematoxylin and eosin staining (fig 2, A). The average size of a mucin-secreting cell at day 6 in the control tissue was  $23 \mu\text{m}^2$  in the crypt and  $33.8 \mu\text{m}^2$  in the villus. After the deletion of Lkb1 the figure rose to  $130.7 \mu\text{m}^2$  in the crypt and to  $94.9 \mu\text{m}^2$  in the villus ( $P < 0.05$ , Mann-Whitney U test). *Muc2* transcript levels were elevated 5-fold in Lkb1-deficient tissue according to quantitative RT-PCR ( $P < 0.05$ , Mann-Whitney U test).

Mucin secreting cells arising in Lkb1-deficient epithelium resembled Goblet cells in shape, but they also secreted Lysozyme (fig 2, B) and contained granules normally specific to Paneth-cells (fig 2, C). Paneth cells in Lkb1-deficient crypts contained smaller Lysozyme secreting electron-dense core and larger mucin-

secreting peripheral halo in comparison with WT crypts according to electron photography (fig 2, C, pictures on the right). These features are consistent with previous descriptions of Intermediate cells (intermediate between Goblet and Paneth cells), which are considered to be rare cells in transition between undifferentiated cells and more mature secretory cells [18].

### Lkb1 loss affects Hes5 expression

Goblet cell differentiation is known to be finely orchestrated by Notch signalling downstream effectors Hes1 and Hes5 at two different points and with a different outcome. Hes1 acts at the progenitor stage promoting enterocyte development and its deletion shifts the ongoing specification of epithelial cells into goblet or endocrine cell fate [19]. Hes5, on the contrary, promotes goblet cell fate but this occurs when the cells have already entered a post-mitotic stage [20].

We therefore analysed levels of the Notch signalling effectors Hes1 and Hes5 by Western blot. Hes1 levels did not significantly change (fig 3, A), but Hes5 was notably elevated (fig 3, A). Immunohistochemical analysis of control intestines at day 6 showed Hes5-positive cells to be localised predominantly at the crypt-villus junction (fig 2, B, +/+). Lkb1-deficient samples showed that Hes5 positive cells also appear at the bottom of the crypt and amongst Paneth cells (fig 2 B, “-/-”).

### Lkb1 deletion in the small intestine reduces Delta ligand levels in secretory cells

The increase in Hes5 expression in Lkb1-negative intestinal epithelium suggested some dynamic changes in Notch signalling. Although Notch1 expression did not seem to be affected (data not shown), we observed a notable change in Delta ligand (*Dll1*) expression in Paneth and goblet cells. In control tissues, *Dll1* was seen in virtually all cells of the crypt, with particularly high levels in Paneth and some goblet cells (fig 2 D, +/+). In Lkb1-deficient intestines Paneth and goblet cells lost *Dll1* staining (fig 2 D, “-/-”). These changes appear to be post-translational, as quantitative RT-PCR showed no changes in *Dll1* mRNA levels. It is known that Par-1 promotes Delta ligand localization on the lateral membrane in *Drosophila* and the depletion of Par-1 disrupts Notch signalling [21]. Par-1 homologues in mammals are MARK kinases and they are located downstream of Lkb1 in the phosphorylation cascade [8]. We found that the phosphorylation of MARKs (using the antibody against the phosphorylated activation loop of MARK1, MARK2 and MARK3 kinases) is significantly reduced in Lkb1-deficient epithelium (fig 3, C). We examined MARK1 expression and found it to be associated primarily with goblet and Paneth cells both in the crypt and in the villus (fig 3, E). Lkb1 deletion did not change this pattern and secretory cells retained the staining (fig 3, E). Surprisingly we did not find any change in the phosphorylation of AMPK (Thr 172) by both western blot (fig 3, C) and immunostaining (fig 4, A). We also did not observe significant changes in mTOR machinery (fig 4, B, C, D) known to control cell size [22]. Furthermore, daily intraperitoneal injections of the mTOR inhibitor Rapamycin (1 mg/kg) did not reverse the phenotype observed in Lkb1-deficient intestinal epithelium (fig 4, F).

### Discussion

By creating a new mouse model with conditional gene deletion of *Lkb1* in the epithelium of the small intestine we have shown that Lkb1 is necessary for normal intestinal cell differentiation and maturation. *Lkb1* deletion not only induced an increase in the size of mucin-secreting cells, but also perturbed their morphology.

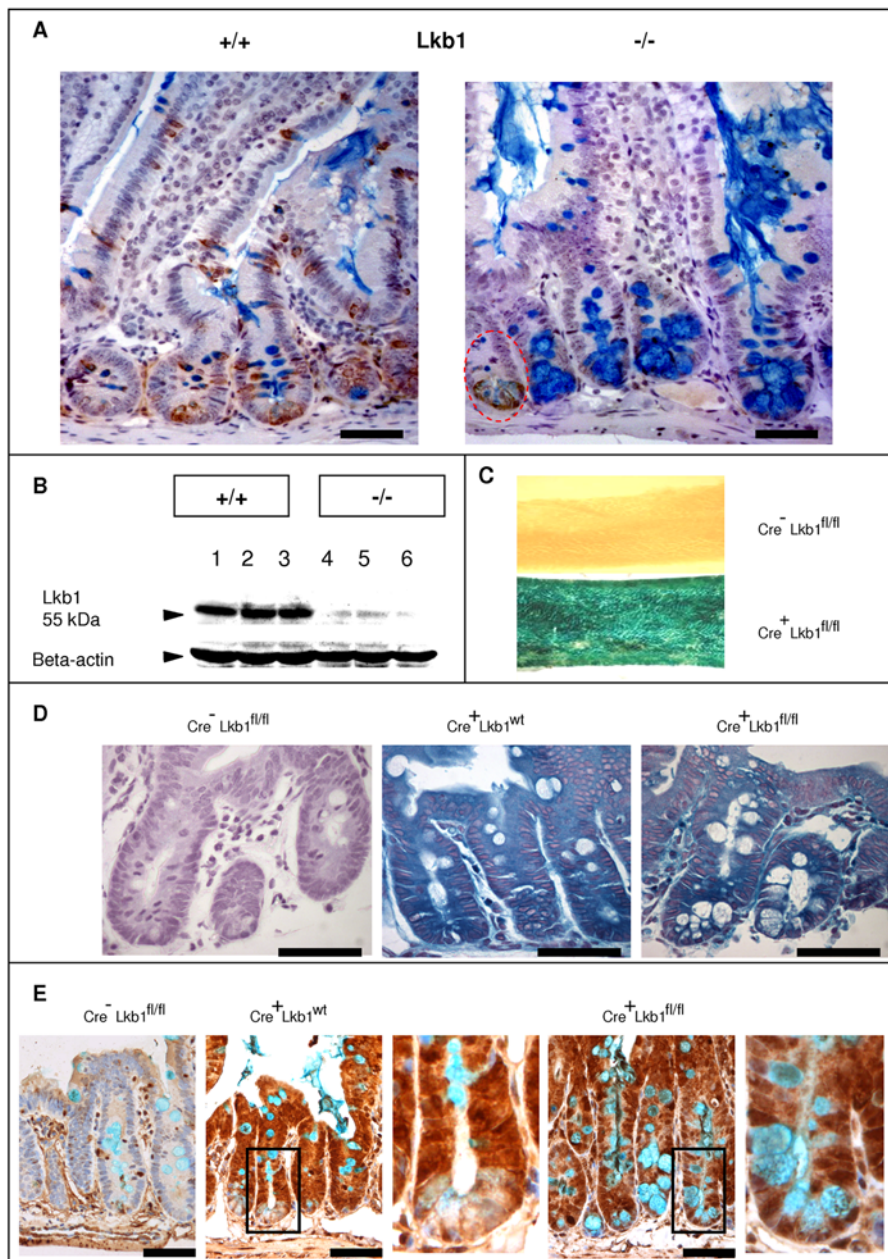

**Figure 1. The induction of *AhCre* recombinase leads to *Lkb1* loss in the epithelium of mouse small intestine.** **A**, Immunohistochemical detection of *Lkb1* expression in induced *Cre*-negative *Lkb1 fl/fl* (*+/+*) and induced *Cre*-positive *Lkb1 fl/fl* intestinal tissue (*-/-*). Alcian blue staining shows the enlargement of mucin-secreting *Lkb1*-deficient cells. The area marked with red is the unrecombined crypt (they represent less than 5% from the whole amount of crypts) with both normal *Lkb1* staining and Paneth cell morphology in induced *Cre*-positive *Lkb1 fl/fl* intestinal tissue (*-/-*). **B**, Western blot analysis of *Lkb1* expression in control (1, 2, 3) and recombined (4, 5, 6) tissue at day 6. **C**, **D**, **E**, *Cre*-mediated recombination is marked by  $\beta$ -galactosidase reporter gene expression. *AhCre*-positive gut shows 100% recombination after a regime of  $\beta$ -naphthoflavone injections compared to no recombination in *Cre*-negative gut tissue (**C**), Intestinal sections from *Rosa26*-positive mice showing the expression of  $\beta$ -galactosidase gene in *Cre*-positive tissue (both wt and *fl/fl*) and the absence of it in *Cre*-negative tissue via X-Gal staining (**D**) and immunostaining with anti- $\beta$ -Galactosidase antibody (**E**). Scale bars correspond to 50  $\mu$ m. doi:10.1371/journal.pone.0004264.g001

Alterations in goblet cell number and elevated mucin production are common features of hamartomas characteristic of PJS [23] and specifically have been associated with loss of heterozygosity regions within hamartomas [3]. Normally, mucin is produced in goblet cells and “intermediate cells” bearing the features of both goblet and Paneth cells are rare. However, these intermediate cells were frequently observed upon *Lkb1* deletion, as indicated by both lysozyme staining (fig 2 B) and electron microscopy (fig 2 C).

Secretory granules of Paneth cells from different animals tend to exhibit bipartite substructure with a peripheral halo of lower density around a large round central core of high electron density [24]. According to histochemical studies the central core of a secretory granule contained basic protein (including lysozyme) while the peripheral halo was built with acid mucopolysaccharides [25,26]. In the case of Intermediate Paneth/goblet cells observed in *Lkb1*-deficient intestines the mucopolysaccharide halo is

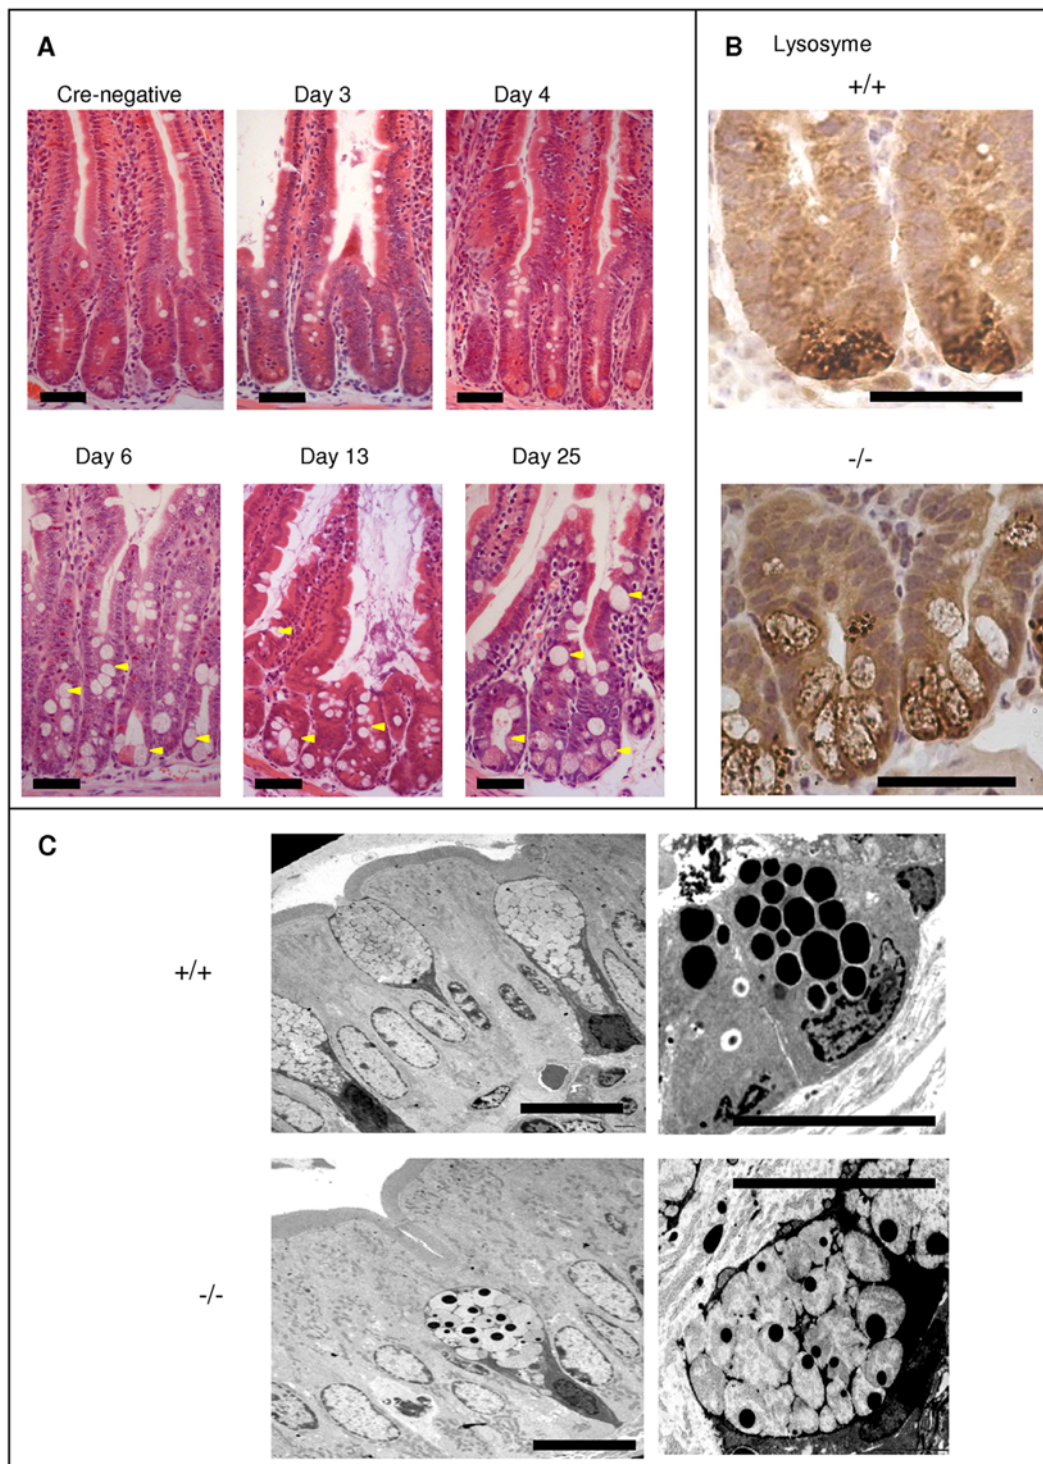

**Figure 2. Lkb1 loss changes cell morphology in the small intestine.** **A**, Haematoxylin and eosin staining of intestinal sections of *Cre*-negative and recombined *Cre+Lkb1fl/fl* mice at days 3, 4, 6, 13 and 25 following injection with  $\beta$ -naphthoflavone. Arrows show enlarged mucin-secreting cells in *Lkb1*-deficient epithelium. **B**, Lysozyme immunostaining displaying mislocalised lysozyme-secreting cells (Paneth and Intermediate cells) moving up *Lkb1*-deficient crypts ( $-/-$ ). **C**, Electron microscopy showing both normal goblet cells and normal Paneth cells in the intestinal tissue of wt mice ( $+/+$ ) as well as an intermediate cell localised in the villus (picture on the left). Paneth cells in *Lkb1*-deficient crypts ( $-/-$ , picture on the right) have visible changes in the bipartite structure of their secretory granules: peripheral halo composed of acid mucopolysaccharides (Spicer et al, 1967) is enlarged and central core (containing lysozyme) is smaller in comparison with WT samples ( $+/+$ ). Scale bars correspond to 50  $\mu$ m (A, B) or 10  $\mu$ m (C). doi:10.1371/journal.pone.0004264.g002

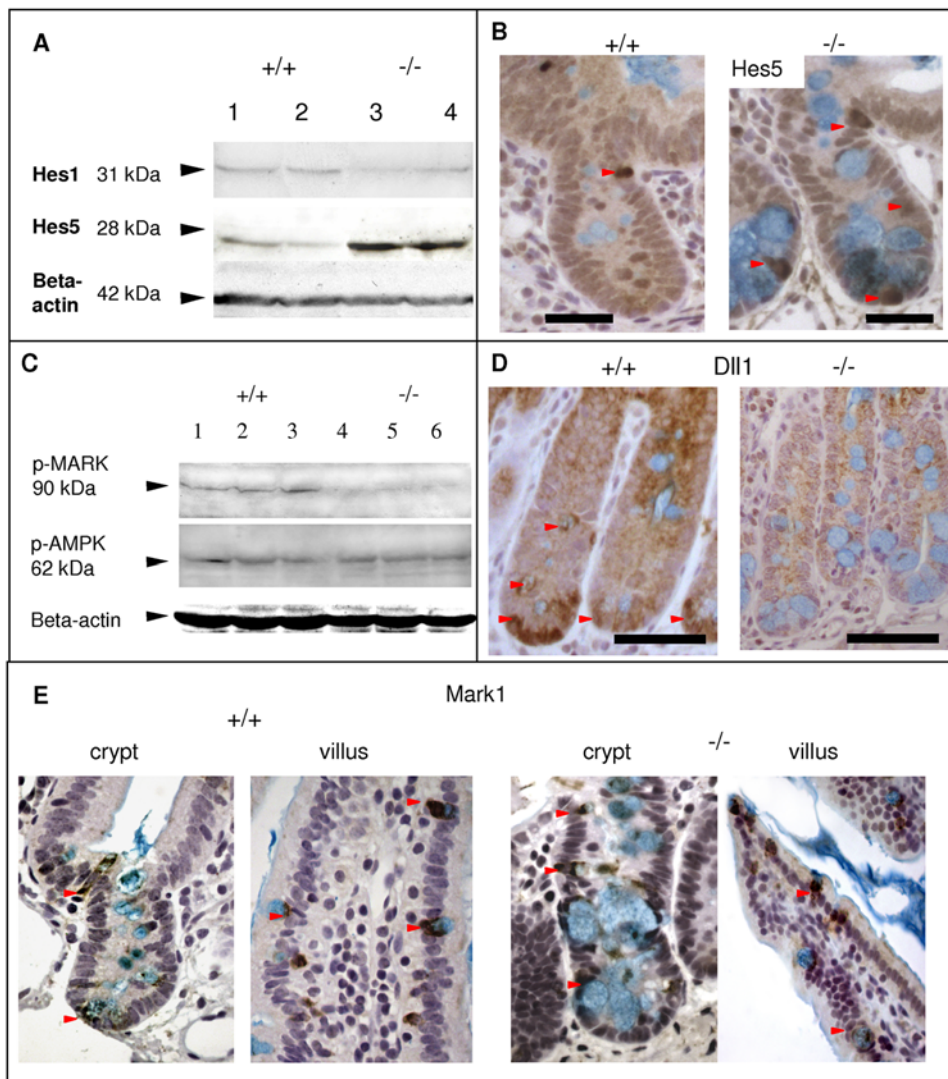

**Figure 3. Lkb1-deficiency alters the expression of Notch signalling components and leads to the abnormal intestinal secretory cell differentiation.** **A**, Western blot analysis of Notch signalling effectors, Hes1 and Hes5 at day 6 in induced *Cre*-negative *Lkb1* *fl/fl* (+/+) (lanes 1, 2) and *Lkb1*-deficient (-/-) intestinal tissue (lane 3, 4), Hes5 expression has a notable increase. **B**, Immunohistochemistry showing the localisation of Hes5-positive cells (pointed with red arrows) in *Lkb1*-deficient crypts (-/-). **C**, Western blot analysis showing decrease in the phosphorylation of MARK kinases activation loop in *Lkb1*-deficient intestine (-/-) while AMPK (Thr 172) phosphorylation levels are intact. **D**, Delta ligand (Dll1) immunostaining at day 6 in induced *Cre*-negative *Lkb1* *fl/fl* (+/+) and *Lkb1*-deficient (-/-) intestines displaying a decrease in Dll1 expression in Paneth and goblet cells of *Lkb1*-deficient intestines. Dll1 positive cells pointed with red arrows. **E**, Immunohistochemistry showing the localisation of Mark1 in goblet and Paneth cells both in WT (+/+) and *Lkb1*-deficient crypts (-/-), pointed with red arrows. Scale bars correspond to 50  $\mu$ m. Alcian Blue stain was performed to show mucin-secreting cells. doi:10.1371/journal.pone.0004264.g003

abnormally large and is stained with alcian blue (fig 1, A) whereas the lysozyme filled central core is significantly smaller than in WT (fig 2, C). This suggests that the loss of *Lkb1* creates a block in the terminal differentiation of secretory cells.

Intestinal cell specification is known to be directed by Notch signalling in mice [27,20], Zebrafish [28] and *Drosophila* [29]. Following *Lkb1* deletion, we observed a decrease in Delta1 ligand (Dll1) expression in goblet and Paneth cells (fig 3, D). In zebrafish intestines Dll1 homologue is also highly expressed in secretory cells, and its inhibition leads to secretory cell expansion [28].

Notch signalling is unidirectional and it is mediated by Delta-expressing cells sending a signal and Notch-expressing cells receiving it. In *Drosophila*, Delta/Notch signalling involves repression of Delta in Notch-expressing cells [30]. Thus, the absence of Delta ligand in

developing goblet or Paneth cells can provide a “signal receiving” role (Notch-expressing) instead of “signal sending”, which in turn can increase Hes5 expression in them.

PAR1 is known to be important for Delta ligand localisation in *Drosophila* [21], so we speculate that the failure in MARK (mammalian homologue of PAR1) activation in the absence of *Lkb1* may directly lead to the lack of Delta ligand in *Lkb1*-deficient Paneth and goblet cells and subsequent deregulation of secretory cell differentiation.

The regulation of secretory cell fate by the Notch pathway is dependent on whether the cell is proliferative or post-mitotic. In proliferative cells, Notch and Hes1 repress a conversion of all dividing crypt cells into goblet cells and this conversion occurs if Notch is inhibited [27,31]. Conversely, a very brief induction of

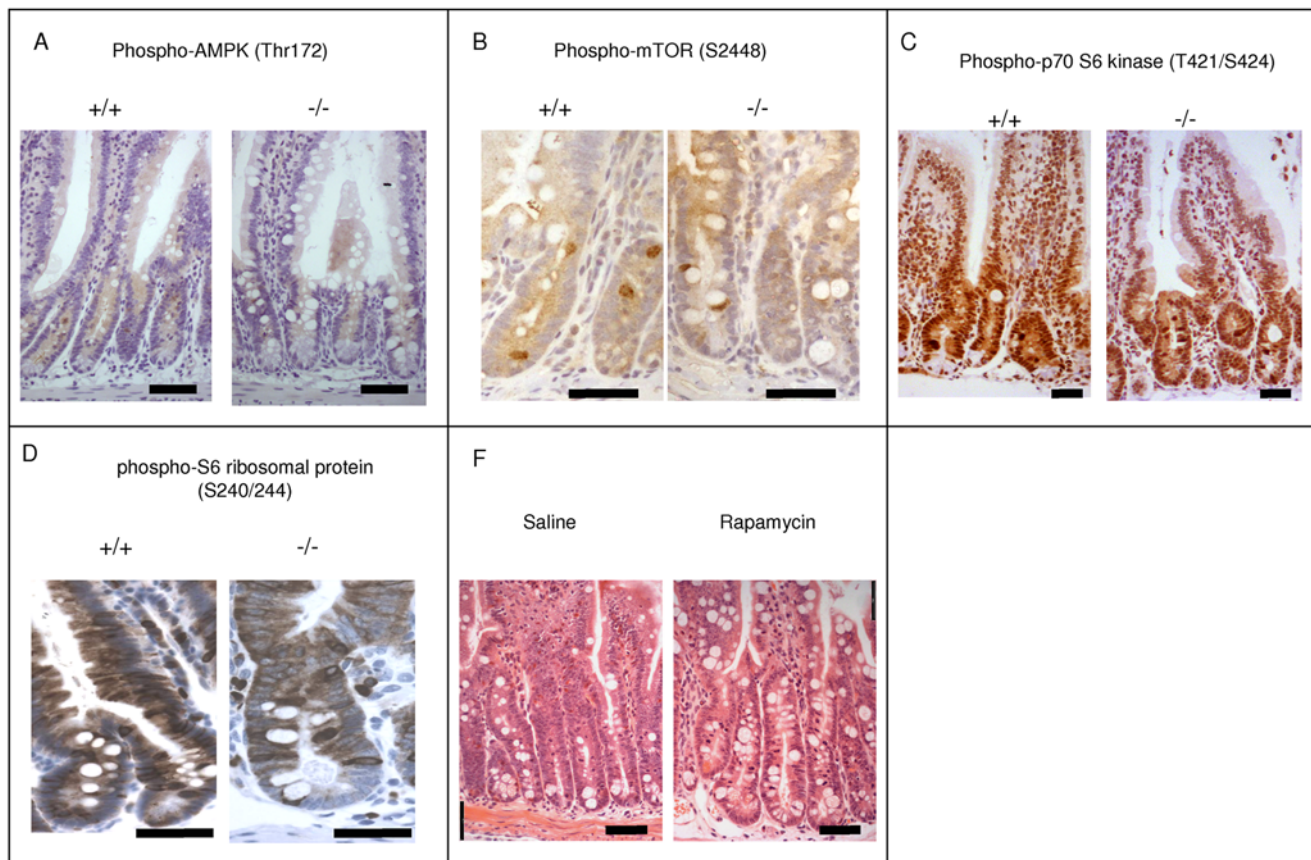

**Figure 4. Lkb1 deletion in mouse intestinal epithelium does not affect mTOR/S6K pathway.** **A, B, C, D.** Immunohistochemical assay showing no difference in expression of phospho-AMPK- $\alpha$  (Thr172) (**A**), phospho-mTOR (Ser-2448) (**B**), phospho-p70 S6 Kinase (Thr421/Ser424) (**C**), phospho-S6 Ribosomal Protein (Ser 240–244) (**D**), between induced Cre-negative Lkb1 *fl/fl* (+/+) and Lkb1-deficient (-/-) samples at day 6. **E.** Haematoxylin and eosin staining of intestinal samples from Lkb1-deficient mice treated and untreated with rapamycin showing no decrease in Lkb1-deficient phenotypic features in the rapamycin-treated sample. Scale bars correspond to 50  $\mu$ m. doi:10.1371/journal.pone.0004264.g004

Notch pathway drives the differentiation of post-mitotic cells into mature goblet cells via Hes5 expression [20]. In our studies, we did not observe changes in overall Hes1 levels, but Hes5 levels were notably higher, suggesting that Lkb1 deletion is more important for the differentiation at the post-mitotic stage (fig 3, A).

The failure in secretory cell terminal differentiation after Lkb1 deletion resembled the effects observed after the terminal differentiation of cell precursors into Paneth cells was blocked via SV40 T antigen expression [32]. This also led to the substitution of the mature Paneth cells with intermediate Paneth/goblet cells showing a decrease in the granule's electron-dense core diameter and expansion of the mucinous area [32]. Notch signalling misregulation observed in Lkb1-deficient intestines may also be explained by consequences arising from the altered terminal differentiation of Paneth cells development. Clearly, further studies are required to address this possibility.

Although mTOR is a known regulator of the cell size [22] and Lkb1 can suppress mTOR via AMPK phosphorylation [9] we did not find evidence of mTOR machinery misregulation in our model (fig 4) suggesting relatively intact energy sensing mechanisms.

Remarkably, given that Lkb1 has been implicated in maintenance of polarity [33,12], we did not observe any obvious perturbations in polarity in the intestinal epithelium. It remains possible that subtle changes are occurring in the absence of Lkb1, but that these do not result in obvious changes to brush border structure and nuclear localization.

In summary, we show a complex sequence of events immediately following loss of function of Lkb1 leading to the inappropriate differentiation of secretory cells associated with abnormal expression of Notch pathway elements and consistent with many features of Notch pathway improper regulation. Our studies therefore reveal a critical role for Lkb1 in maintaining normal gut homeostasis.

## Materials and Methods

### Mice breeding and Cre recombinase induction

All experiments were carried out according to Home Office regulations. *Lkb1<sup>fl/fl</sup>* mice [11] were crossed to mice harbouring *Ah-Cre* transgene [13] and the offspring intercrossed to derive an outbred colony segregating for C57BL6/J, 129/Ola and C3H genomes. Mice were genotyped by PCR using DNA extracted with Puregene DNA extraction kit (Gentra systems) using following primers: *Cre*, TGACCGTACACCAAAATTTG (F) and ATTGCCCTGTTTCACTATC (R) (991 bp product); *Rosa26R*, CTGGCGTTACCAACTTAAT (F) and ATAAGTCCCGTCACTCCAAC (R) (533 bp product); *Lkb1* allele: GTA-CTTCCGCCAGCTGATTGA (F) and AGTGTGACCCAGCTGACCA (R) (320 bp and 280 bp products correspond to WT and *Lkb1<sup>fl/fl</sup>* alleles respectively). Mice were intraperitoneally injected with 80 mg/kg  $\beta$ -naphthoflavone (dissolved in corn oil) once daily for up to 4 days to induce *Ah-Cre* gene expression and

*Lkb1<sup>fl</sup>* allele recombination. All times indicated in the text were related to the time elapsed since the first exposure.

### β-Galactosidase analysis

7 cm long gut samples were flushed with cold water, opened out and fixed with pins on a wax plate. Following a quick fix in 2% formaldehyde/PBS/0.1% glutaraldehyde, intestines were demucified and left to stain in X-gal solution overnight (as described in [14]). The recombination was assessed by blue staining in crypts and villi and its efficiency was scored according to previous criteria [13].

### Electron Microscopy

Intestinal samples were fixed in 2% paraformaldehyde (w/v), 2% glutaraldehyde (v/v) in cold 0.1 M cacodylate buffer (pH 7.4) for 2 hours, washed briefly, and then post fixed in cacodylate-buffered 1% osmium tetroxide containing 1.5% potassium ferrocyanide for 1 hour. Specimens were washed thoroughly and then stained *en bloc* with 2% aqueous uranyl acetate for 1 hour, dehydrated through ethanol gradient and cleared in propylene oxide before, embedding in araldite resin. Semi-thin resin sections (1 μm in thickness) were cut and stained with 1% toluidine blue in borax to localise the area of interest within the tissue. Further 60 nm sections were cut and collected on formvar-coated 200 mesh copper grids and stained with 2% aqueous uranyl acid (w/v) and Reynolds lead citrate. Representative areas of gut samples were then photographed.

### RNA Extraction and qRT-PCR analysis

RNA was isolated from intestinal samples of 6–10 week old littermate mice. 2×1 cm proximal end sections of the small intestine were taken to RNeasy<sup>TM</sup> (Sigma). Tissues were homogenised in TRIZOL<sup>TM</sup> Reagent (Invitrogen) and extracted using standard Phenol-chloroform protocol. Reverse transcription was performed by using the SuperscriptII reverse transcriptase kit (Invitrogen) and random hexamers (Invitrogen) according to the manufacturer's instructions. DyNAmo SYBR green supermix (Finnzymes, GRI, Essex, U.K.) was added to appropriate cDNA samples and primers. Samples were loaded onto a white one-piece thin-wall 96-well PCR plate (Bioplastics). The PTC-200 Peltier thermal cycler (MJ Research) and Chromo4 fluorescence detector (MJ Research) were used in conjunction with Opticon Monitor analysis software (version 2.03, MJ Research) to calibrate and run the reaction. qRT-PCR was performed on all samples including reverse transcriptase negative controls. All the control samples were checked and proved to be negative on a 2% agarose gel. β-actin and GAPDH were used as reference genes. Primer sequences are as follows: *Beta-actin*, 5'-CTTCCCTCCCTGGAGAAGAGC-3' (forward), 5'-AAGGAA-GGCTGGAAAAGAGC-3' (reverse), *GAPDH*, 5'-CACTGAG-CATCTCCCTCACA-3' (forward), 5'-GTGGGTGCAGCGAAC-TTTAT-3' (reverse), *Hes1*, 5'-TAACGCAGTGTCACCTTCCA-3' (forward), 5'-AAGAGAGAGGTGGGCTAGGG-3' (reverse), *Lkb1* 5'-CTCCGAGGGATGTTGGAGTA-3' (forward), 5'-GCTTGGTGGGATAGGTACGA-3' (reverse) *Muc2* 5'-ACAT-CACCTGTCCCGACTTC-3' (forward), 5'-GAGCAAGG-GACTCTGGTCTG-3' (reverse).

All primers used were designed using primer3<sup>TM</sup> software. Reaction conditions were as follows: 95°C 30 s, 60°C 30 s, 72°C 30 s for 35 cycles. Fold change was determined as previously described using 2<sup>-ΔΔCT</sup> method [34].

### Western analysis

Intestinal tissue (50–100 mg) was snap frozen in liquid nitrogen and ground using a mortar and a pestle and then solubilised in

500 μl of lysis buffer (50 mM Tris pH 7.5, 100 mM NaCl, 5 mM EDTA, 5 mM EGTA, 0.5% NP-40, 40 mM β-glycerolphosphate, 0.5 μg/ml each Leupeptin, Pepstatin, Chymostatin, 50 mM NaF, 5 mM Na<sub>3</sub>VO<sub>4</sub>, with 1 μM microcystin) for 10–20 minutes on ice. Insoluble material was removed by centrifugation at 20 g for 10 minutes and supernatants were aliquoted and snap frozen in liquid nitrogen. Protein concentrations were determined using a Coomassie based method (Bio-Rad). Equal amounts of cellular protein (60 μg) were separated on 10% acrilamide gel and subsequently transferred on Hybond ECL nitrocellulose membrane (Amersham Biosciences). Total protein was visualized with Poinceau (Sigma). After blocking the membranes in TBS containing 5% BSA, 0.05% Tween 20, 0.02% NaN<sub>3</sub> for 1 hour, primary antibodies were added in block solution for overnight incubation at 4°C. After five times five minute washes in TBS, 0.05% Tween 20, the appropriate HRP-conjugated secondary donkey antibodies (Amersham Biosciences) were added (dilution 1:5000) for 30 minutes. After five washes (five minutes each) antibody binding was detected using ECL reagent (Amersham Biosciences). The sources and dilutions of the primary antibodies used for western blotting analysis are stated in the Supplementary Table S1.

### Immunohistochemistry

Immunohistochemistry was performed on formalin fixed tissue (Lkb1 immunohistochemistry was performed on methacarn fixed tissue). 3×1 cm gut fragments (7–10 cm away from the stomach) were flushed with water, bound in surgical tape and fixed in formalin or methacarn for a maximum of 14 hours at 4°C. All fixed samples were embedded in paraffin and sectioned to 5–6 μm on poly L-lysine slides for immunohistochemical analysis. Antigen retrieval was performed by boiling in citrate buffer (LabVision) for 10 minutes at 100°C. The endogenous peroxidase was blocked by EnVision blocking solution (DakoCytomation) for 5 minutes. The non-specific binding was blocked for 30 minutes with either 5% goat serum (DakoCytomation) for the primary rabbit polyclonal antibodies or 5% rabbit serum (DakoCytomation) for the primary mouse monoclonal antibodies and primary antibody incubation was performed at 4°C overnight. The detection was performed using secondary antibody horseradish peroxidase-labelled polymer and DAB reagent (DakoCytomation). The sources and dilutions of the primary antibodies used for immunohistochemical analysis are stated in the Supplementary Table S2.

### Supporting Information

**Table S1** Antibodies used for western blot analysis.

Found at: doi:10.1371/journal.pone.0004264.s001 (0.03 MB DOC)

**Table S2** Antibodies used for immunohistochemical analysis.

Found at: doi:10.1371/journal.pone.0004264.s002 (0.03 MB DOC)

### Acknowledgments

We thank Geriant Williams for helpful discussions and EM staff at the Cardiff School of Medicine EM department

### Author Contributions

Conceived and designed the experiments: BYS JZ OJS AC. Performed the experiments: BYS JZ HBP. Analyzed the data: BYS JZ AC. Contributed reagents/materials/analysis tools: AM DW AA. Wrote the paper: BYS AC.

## References

- Tiainen M, Ylikorkala A, Makela TP (1999) Growth suppression by LKB1 is mediated by a G(1) cell cycle arrest. *Proc Natl Acad Sci U S A* 96: 9248–51.
- Marignani PA, Kanai F, Carpenter CL (2001) LKB1 associates with Brg1 and is necessary for Brg1-induced growth arrest. *J Biol Chem* 276: 32415–8.
- Hemminki A, Tomlinson I, Markie D, Järvinen H, Sistonen P, et al. (1997) Localization of a susceptibility locus for Peutz-Jeghers syndrome to 19p using comparative genomic hybridization and targeted linkage analysis. *Nat Genet* 15(1): 87–90.
- Yoo LI, Chung DC, Yuan J (2002) LKB1-a master tumour suppressor of the small intestine and beyond. *Nat Rev Cancer* 2: 529–35.
- Tomlinson IP, Houlston RS (1997) Peutz-Jeghers syndrome. *J Med Genet* 34: 1007–11.
- Katajisto P, Vaahtomeri K, Ekman N, Ventelä E, Ristimäki A, et al. (2008) LKB1 Signaling in Mesenchymal Cells Required for Suppression of Gastrointestinal Polyposis. *Nature Genetics* 40(4): 455–9.
- Hawley SA, Boudeau J, Reid JL, Mustard KJ, Udd L, et al. (2003) Complexes between the Lkb1 tumor suppressor, STRAD alpha/beta and MO25 alpha/beta are upstream kinases in the AMP-activated protein kinase cascade. *J Biol* 2(4): 28.
- Lizcano JM, Goransson O, Toth R, Deak M, Morrice NA, et al. (2004) Lkb1 is a master kinase that activates 13 kinases of the AMPK subfamily, including MARK/PAR-1. *EMBO J* 23(4): 833–43.
- Shaw RJ, Kosmatka M, Bardeesy N, Hurley RL, Witters LA, et al. (2004) The tumor suppressor LKB1 kinase directly activates AMP-activated kinase and regulates apoptosis in response to energy stress. *Proc Natl Acad Sci U S A* 101: 3329–35.
- Mirouse V, Swick LL, Kazgan N, St Johnston D, Brenman JE (2007) LKB1 and AMPK maintain epithelial cell polarity under energetic stress. *J Cell Biol* 177(3): 387–92.
- Sakamoto K, McCarthy A, Smith D, Green KA, Hardie DG (2005) Deficiency of LKB1 in skeletal muscle prevents AMPK activation and glucose uptake during contraction. *EMBO J* 24(10): 1810–20.
- Pearson HB, McCarthy A, Collins CMP, Ashworth A, Clarke AR (2008) Lkb1 Deficiency Causes Prostate Neoplasia in the Mouse. *Cancer Research* 68: 2223–2232.
- Ireland H, Kemp R, Houghton C, Howard L, Clarke AR, et al. (2004) Inducible *Cre*-mediated control of gene expression in the murine gastrointestinal tract: effect of loss of  $\beta$ -catenin. *Gastroenterology* 126: 1236–46.
- Sansom OJ, Reed KR, Hayes AJ, Ireland H, Brinkmann H, et al. (2004) Loss of *Apc* in vivo immediately perturbs Wnt signalling, differentiation, and migration. *Genes Dev* 18: 1385–90.
- Rowan A, Churchman M, Jefferey R, Hanby A, Poulson R, Tomlinson I (2000) In situ analysis of LKB1/STK11 mRNA expression in human normal tissues and tumours. *J Pathol* 192: 203–206.
- Soriano P (1999) Generalized lacZ expression with the ROSA26 *Cre* reporter strain. *Nat Genet* 21: 70–1.
- Kemp R, Ireland H, Clayton E, Houghton C, Howard L, Winton DJ (2004) Elimination of background recombination: somatic induction of *Cre* by combined transcriptional regulation and hormone binding affinity. *Nucleic Acids Res* 32(11): e92.
- Troughton WD, Trier JS (1969) Paneth and goblet cell renewal in mouse duodenal crypts. *J Cell Biol* 41(1): 251–68.
- Jensen J, Pedersen EE, Galante P, Hald J, Heller RS, et al. (2000) Control of endodermal endocrine development by Hes-1. *Nature Genet* 24: 36–44.
- Zecchini V, Domaschenz R, Winton D, Jones P (2005) Notch signaling regulates the differentiation of post-mitotic intestinal epithelial cells. *Genes Dev* 19: 1686–91.
- Bayraktar J, Zygmunt D, Carthew RW (2006) Par-1 kinase establishes cell polarity and functions in Notch signaling in the *Drosophila* embryo. *J Cell Sci* 119(Pt 4): 711–21.
- Fingar DC, Salama S, Tsou C, Harlow E, Blenis J (2002) Mammalian cell size is controlled by mTOR and its downstream targets S6K1 and 4EBP1/eIF4E. *Genes and Development* 16: 1472–1487.
- Wang ZJ, Ellis I, Zauber P, Iwama T, Marchese C, et al. (1999) Allelic imbalance at the LKB1 (STK11) locus in tumours from patients with Peutz-Jeghers' syndrome provides evidence for a hamartoma-(adenoma)-carcinoma sequence. *J Pathol* 188: 9–13.
- Satoh Y, Yamano M, Matsuda M, Ono K (1990) Ultrastructure of Paneth cells in the intestine of various mammals. *Journal of Electron Microscopy Technique* 16: 69–80.
- Spicer SS, Staley MW, Wetzel MG, Wetzel BK (1967) Acid mucosubstance and basic protein in mouse Paneth cells. *J Histochem Cytochem* 15: 225–242.
- Selzman HM, Liebelt RA (1962) Paneth cell granule of mouse intestine. *J Cell Biol*. pp 15136–139.
- van Es JH, van Gijn ME, Riccio O, van den Born M, Vooijs M, et al. (2005) Notch/gamma-secretase inhibition turns proliferative cells in intestinal crypts and adenomas into goblet cells. *Nature* 435: 959–63.
- Crosnier C, Vargesson N, Gschmeissner S, Ariza-McNaughton L, Morrison A, Lewis J (2005) Delta-Notch signalling controls commitment to a secretory fate in the zebrafish intestine. *Development* 132(5): 1093–104.
- Ohlstein O, Spradling A (2007) Multipotent *Drosophila* intestinal stem cells specify daughter cell fates by differential Notch signaling. *Science* 315: 988–992.
- Sapir A, Assa-Kunik E, Tsruya R, Schejter E, Shilo BZ (2005) Unidirectional Notch signaling depends on continuous cleavage of Delta. *Development* 132(1): 123–32.
- Fre S, Huyghe M, Mourikis P, Robine S, Louvard D, Artavanis-Tsakonas S (2005) Notch signals control the fate of immature progenitor cells in the intestine. *Nature* 435: 964–8.
- Garabedian EM, Roberts IJ, McNevin MS, Gordon JI (1997) *J Biol Chem* 272: 23729–23740.
- Baas AF, Kuipers J, van der Wel NN, Batle E, Koerten HK, Peters PJ, Clevers HC (2004) Complete polarization of single intestinal epithelial cells upon activation of LKB1 by STRAD. *Cell* 116: 457–66.
- Livak KJ, Schmittgen TD (2001) Analysis of relative gene expression data using real-time quantitative PCR and the 2(-Delta Delta C(T)) Method. *Methods* 25: 402–8.
